# Supplementary figures and images for: Insight into the inhibition mechanism of kukoamine B against CpG DNA via binding and molecular docking analysis
Source: Royal Society of Chemistry journal article supplement (doi:10.1039/c6ra11646a), 2016-01-01

Fig. S1 ESI Mass Spectrum of Kukoamine B (KB)

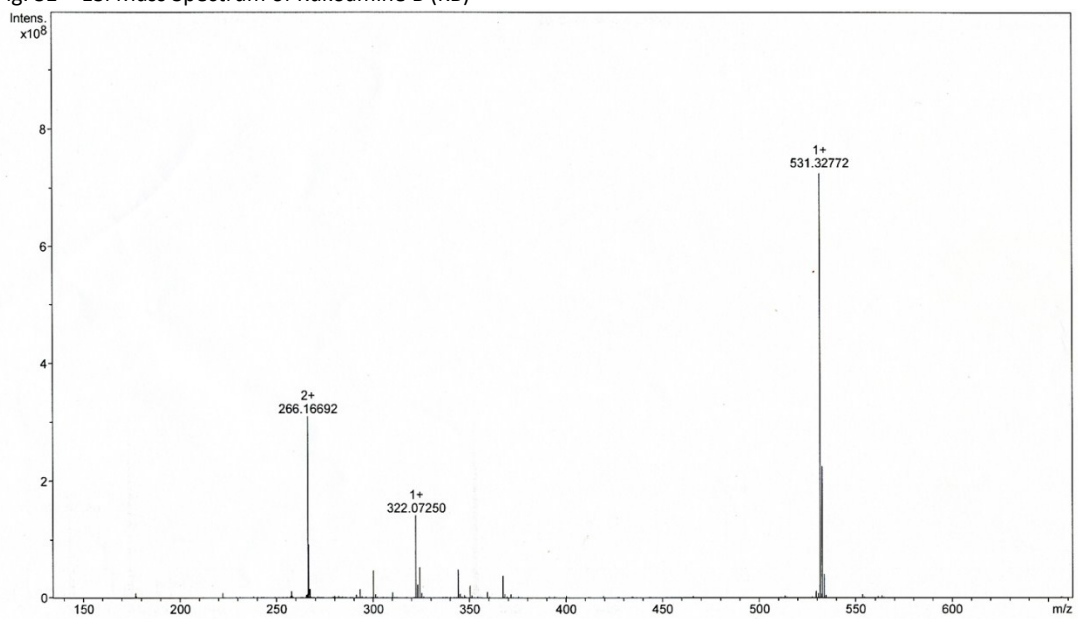

Supplement: c6ra11646a1.pdf [file c6ra11646a1.pdf]
